# Supplementary material for: The Three Horses of Sustainability&mdash;Population, Affluence and Technology
Source: Preprints.org preprint supplement (doi:10.20944/preprints201812.0176.v1), 2018-12-17
Supplement: Supplementary file 1 [file supplementary]

# 2 **The three horses of sustainability – population,** 3 **affluence and technology**

4 **David O. Obura**

5  
6 This file includes:  
7 Text S1 to S4.  
8 Figures S1 and S2  
9 Tables S1 and S2

## 10 **Text S1: The IPAT model**

11 The IPAT equation holds that the total impact of economic and social activity is a function of  
12 population size (P), level of affluence (A) and an energy or technology factor (T) [9-11]:

$$14 \text{ Impact} = f(\text{Population, Affluence, Technology}) \quad \text{Equation (1)}$$

15  
16 Most simply, population, affluence and technology are multiplied together, providing a strong  
17 first approximation of the classic photographs of weekly food consumed in countries with different  
18 cultures, but also principally different levels of wealth [30]. The argument is made here at the level  
19 of national economies and households in different countries, though it could apply to any entity such  
20 as an organization, and individuals.

21  
22 Population, Affluence (consumption of goods and services) and Technology (or energy/material  
23 cost), can and have been framed differently by different authors [14,19,50] (and see main text). Here,  
24 Population is given by the world population (fig. S1a). Affluence is approximated by the United  
25 Nations Development Programme's (UNDP) Human Development Index (HDI, fig. S1b), where the  
26 direct access to ecosystem services and other natural assets in lower income countries (e.g. through  
27 local or home production of food) compensates for the mainly market access to these services in richer  
28 countries. Technology is approximated by Gross National Income (GNI, fig. S1c), as a proxy for access  
29 to and use of energy and manufactured products in richer vs. poorer countries. Quantitative  
30 improvements can be made to this parametrization, that also deal better with correlation among the  
31 factors, but the focus here is on broad properties [37].

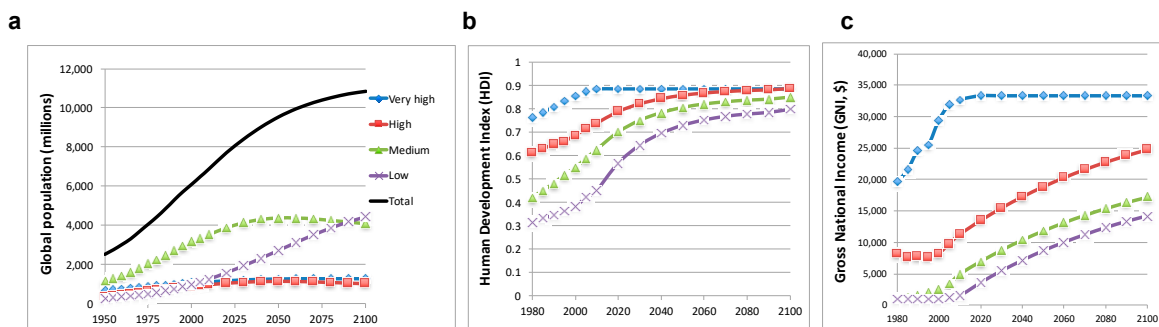

33  
34 **Figure S1.** Factors in the IPAT equation - population, affluence and technology. a) global population  
35 (in millions), b) Human Development Index (HDI) and c) Gross National Income (GNI, \$ per capita)  
36 in Very High, High, Medium and Low HDI countries. Impact (IPAT) is a product of these three, see  
37 fig. 1. Numbers up to 2015 are measured data, after 2015 are projections [31,32].

38  
39 The model proceeds on two premises, with three simplifying assumptions:

40

41 Premise 1 – countries are at various stages of economic development, expressed by HDI. Four  
 42 groups are used: Very High (includes US, Europe, Japan, Australia); High (includes Russia, many  
 43 Middle East states); Medium (includes China, India, South Africa) and Low (most developing and  
 44 low-income countries) [31].

45

46 Premise 2 – country populations can be described by the model of demographic transition [51].  
 47 They start at low population densities where birth and death rates are high (stage 1). As affluence  
 48 increases first death rates decline first (stage 2) then birth rates (stage 3), which results in rapid  
 49 increases in population growth in stage 2 and into stage 3, due to the differential between these. In  
 50 stage 4 when affluence is high, birth and death rates equilibrate at low levels, so population growth  
 51 slows and halts. Finally, in stage 5, at high affluence and ageing populations, death rates may exceed  
 52 growth rates, resulting in population decline.

53

54 Assumption 1 – Population growth is based on median projections established by the United  
 55 Nations (fig. S1a) [32].

56

57 Assumption 2 – Equity – all countries aspire to, and have the right to achieve, equivalent living  
 58 standards to those experiencing the highest quality of life. Also by this principle countries should not  
 59 be expected to accept a decline in living standards, so all must eventually converge towards the  
 60 highest living standards, as currently experienced in Very High HDI and high GNI countries. To  
 61 simplify calculations, the model caps HDI and GNI at current levels in Very High HDI countries (fig.  
 62 S1b,c), as projecting these several decades into the future is not possible simply.

63

64 Assumption 3 – the principle of ‘common but differentiated responsibilities’ as accepted in the  
 65 United Nations Framework Convention on Climate Change [52], holds that effort in reducing total  
 66 impact should be proportional to current wealth (and this also reflects contribution to past impact) –  
 67 i.e. wealthier countries adopt higher efficiency targets to reduce their total impact, while poorer  
 68 countries adopt lower targets, and with later timelines. Over time, as wealth equilibrates across  
 69 countries, they will converge towards the same efficiency targets.

70

71 For this application, the IPAT equation is modified by a coefficient ‘e’, where e varies between 0  
 72 and 1 ( $0 < e < 1$ ; presented in the text as a percentage). e represents a reduction in total impact achieved  
 73 by reducing population, affluence, or technology, or a combination of these, below reference levels.  
 74 Thus, (1-e) enables calculation of the resulting Impact. The parameters population, affluence and  
 75 technology are multiplied together as the most simple expression of the model. The IPAT equation is  
 76 thus modified to:

77

$$\text{Impact} = (1-e) * f(\text{Population} \times \text{Affluence} \times \text{Technology}) \quad \text{Equation (2)}$$

78

79 The model is used to consider two basic scenarios (figs. 1a,b), applied through varying the  
 80 coefficient e (fig. 1c):

81

82 Business as usual – current trends in population, HDI and GNI continue into the future.  $e = 0$ .  
 83 Using Assumption 2 to simplify calculations, HDI and GNI are capped at current levels in Very High  
 84 HDI countries.

85

86 Sustainable future – total Impact is capped at 2020 levels, achieved by varying e between 0 and  
 87 1. Assumption 3 is applied by applying different levels of e by HDI class such that Very High HDI  
 88 countries adopt higher and earlier efficiencies than Low HDI countries.

88

89 **Text S2: exploration of the model factors, limitations and some assumptions for further research**

90

91 The three major factors each have a fundamental contribution, some key aspects of these being  
 92 explored in the following text.

93  
 94 Population – the model uses median estimates of population growth, but the same source  
 95 provides lower and upper confidence limits for growth (fig. S2). At higher growth rates, population  
 96 will be growing in all income categories in 2100, and Low HDI countries still show accelerating  
 97 growth rates. At lower growth rates, population in all HDI categories is stabilized and decreasing by  
 98 2100, with global population having peaked at under 9 billion in 2050, and declined to under 8 billion,  
 99 just over today's levels, in 2100. Adjustment of the model to lower population levels (not presented  
 100 in detail here) lessens the efficiency required from all countries, e.g. from 70 to 50 per cent for Very  
 101 High and High HDI countries, from 60 to 40 per cent for Medium HDI countries, and from 50 to 30  
 102 percent for Low HDI countries, representing significantly less effort needed. By contrast, higher  
 103 population projections require correspondingly higher reductions in affluence and technology. Of  
 104 critical importance with respect to political will across all countries is that differentiating these  
 105 population-based scenarios does not occur until after 2030 in Very High HDI countries and after 2050  
 106 in Low HDI countries, a dramatic 10 – 30 year lag that makes garnering political and social  
 107 commitment to putting in place these long term solutions now extremely challenging.  
 108

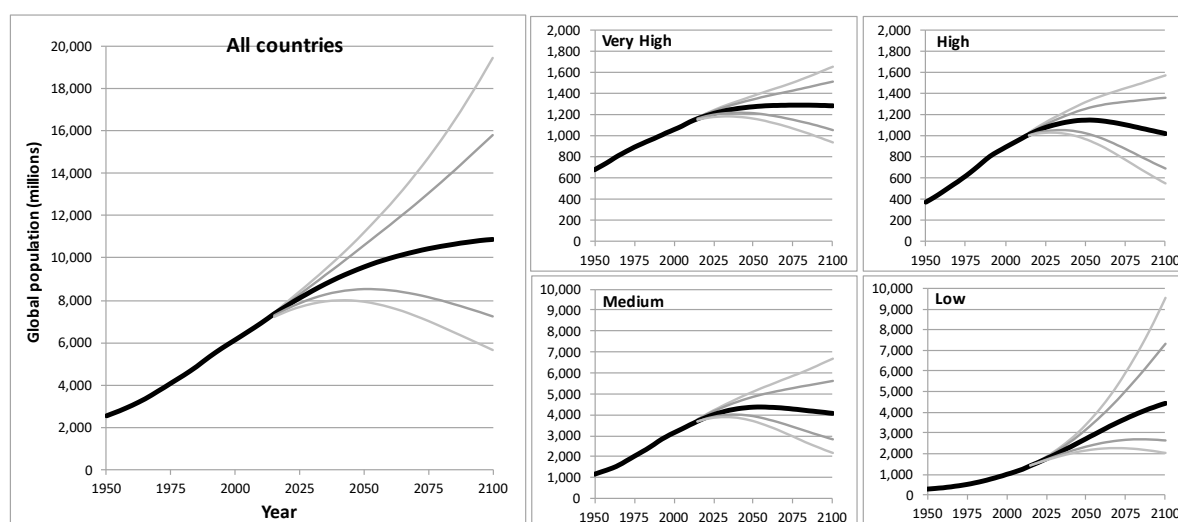

109  
 110 **Figure S2.** Population growth rates projected by the United Nations for total world population, split  
 111 by HDI levels: Very High, High, Medium and Low [31,32]. In each figure, the black line shows the  
 112 median, and the grey lines the 80% and 95% percentile estimates of population.

113  
 114 Affluence - reductions in affluence can occur only with a radical transformation in value systems  
 115 from the current paradigm that primarily values monetary and material accumulation, to one that  
 116 values more qualitative and non-material values. Economies and financial markets must no longer  
 117 exclusively value material growth as the primary measure of wealth. This is recognized in many  
 118 fields of contemporary writing (see Text S4), and means changing the 'usual' part of 'business as  
 119 usual', however operationalizing this principle at scale is elusive. Repeated warnings that capital and  
 120 financial markets have not transformed from the practices that produce repeated 'bubbles' are  
 121 illustrative of the failure to change what is considered as affluent. Attempts to identify measures  
 122 other than GDP to measure wealth of countries<sup>1</sup> and of corporations [53,54] are being prototyped.  
 123 HDI is a step in this direction.

<sup>1</sup> for example, the Gross National Happiness index,

<http://www.grossnationalhappiness.com/articles/> Accessed 7 February 2016; Human

124  
 125  
 126  
 127  
 128  
 129  
 130  
 131  
 132  
 133  
 134  
 135  
 136  
 137  
 138  
 139  
 140  
 141  
 142  
 143  
 144

Technology - reductions in technology impact are perhaps the easiest to implement in that the physical, chemical and biological costs of production and consumption can be dramatically reduced through transforming the way energy and materials are used and recycled. Potential solutions for businesses and the corporate world are currently best expressed in the concept of circular economy<sup>2</sup>. This transforms the linear business model – that extracts natural resources as essentially free goods and emits waste products with limited accounting of their impacts – into a circular one that does two fundamental things. First, it accounts for all raw material inputs from nature, such that all impacts are reduced to zero and/or mitigated in full. Second, waste is reduced to as close to zero as possible by making all outputs an input to another business process, such as in recycling material waste, or scrubbing carbon dioxide from emissions. These are viewed as costs in the linear model and therefore minimized to maximize profit of the business entity; however the costs they impose through pollution (or e.g. climate change) are borne by others, and may be much higher than the initial direct cost. In a circular model they reflect opportunities for investment and further generation of wealth and jobs – in another business, another sector, or in societal or other benefits (e.g. a clean environment).

Further exploration of the premises, assumptions and corollaries of the model is possible (Table S1) but beyond the scope of this paper.

**Table S1.** Some assumptions and caveats about the model, of interest for further exploration.

| <b>Issue</b>                                    | <b>Description</b>                                                                                                                                                                                                                                                                                                                                                                                                                                                                   |
|-------------------------------------------------|--------------------------------------------------------------------------------------------------------------------------------------------------------------------------------------------------------------------------------------------------------------------------------------------------------------------------------------------------------------------------------------------------------------------------------------------------------------------------------------|
| Within-country application                      | Within countries and economies, similar principles can apply among businesses, income classes and households, to achieve sustainability solutions in an equitable and transparent way.                                                                                                                                                                                                                                                                                               |
| Current global footprint exceeds 1 planet earth | Though capping affluence and technology at today's levels, the model also provides for potential reductions. The need for greater reduction is explicit in that humanity's footprint today is 1.5 planet earths (WWF 2016), and this needs to reduce to under 1 for true sustainability. This is also illustrated by the need to reduce atmospheric carbon dioxide concentrations from today's level of 407 ppm to below the safe limit of 350 ppm that was passed before 1990 [55]. |
| HDI and GNI cap (Assumption 2)                  | The assumption that caps HDI at current levels in Very High HDI countries could be relaxed, which would require greater efficiencies to be put in place. However, once transformations in P, A or T are underway, allowing HDI to grow may not have the same impact implications as it currently has.                                                                                                                                                                                |
| Measures of affluence and technology            | Use of HDI as the measure of affluence, and GNI for technology rather than affluence, may be debatable and provides avenues for improved parametrization of this model.                                                                                                                                                                                                                                                                                                              |
| Does reducing impacts cost?                     | One assumption embedded within the principle of common but differentiated responsibilities (Assumption 3) is that there is a cost to reducing impact. This may not always be the case, as there may be multiple and broader benefits that stakeholders may obtain from more equitable approaches to reducing impact that transforms apparent costs into benefits, and this may be true for both richer [56] and poorer countries [57]. Further,                                      |

Development Index (HDI), United Nations Development Programme (UNDP) - <http://hdr.undp.org/en/content/human-development-index-hdi> [Accessed 7 February 2016].

<sup>2</sup> See <https://www.ellenmacarthurfoundation.org/circular-economy/overview/concept> (accessed 10 August 2016) and <http://www.circularecology.com/> [accessed 10 August 2016]

|  |                                                                                                                                                                                                                                         |
|--|-----------------------------------------------------------------------------------------------------------------------------------------------------------------------------------------------------------------------------------------|
|  | costs associated with reduction of impacts at source may be less than costs associated with those impacts borne by broader society, but not well-costed or accurately attributed, so this may be a matter of just attribution of costs. |
|--|-----------------------------------------------------------------------------------------------------------------------------------------------------------------------------------------------------------------------------------------|

145  
146  
147  
148  
149  
150  
151  
152  
153  
154  
155  
156

The IPAT model has been debated extensively in the past and does have its weaknesses. These are summarized as follows [58]: "IPAT itself has been criticized because it does not account for interactions among the terms (e.g., increasing affluence can lead to more efficient technologies); it omits explicit reference to important variables such as culture and institutions (e.g., social organization); impact is not linearly related to the right side variables (there can be important thresholds); and it can simply lead to wrong conclusions." The intent here is not to ignore these problems, as they can be addressed in specific circumstances. Rather, the intent is to return to a simpler expression of causal relationships [37] that through their relevance and accessibility to people, businesses and politics, can stimulate behaviour change [8].

### 157 Text S3 Estimating impact from images of household weekly food intake

158 Images household weekly food intake [30] were downloaded and the data derived from them  
159 (Table S2). Various formulations of the IPAT equation were trialed (Table S2), with trial D being  
160 retained as being most descriptive of the information content of the images. These values are used in  
161 fig. 2, assigned to the year 2020.  
162

163 **Table S2.** Data obtained from images of household weekly food intake (Menzel 2013).

| Variable                         | Description                                                                                                                                                                                                           | Value                        |
|----------------------------------|-----------------------------------------------------------------------------------------------------------------------------------------------------------------------------------------------------------------------|------------------------------|
| <b>Metadata</b>                  |                                                                                                                                                                                                                       |                              |
| Continent                        | Continent, based on country name                                                                                                                                                                                      | Text                         |
| Country                          | Country name                                                                                                                                                                                                          | Text                         |
| City                             | City name assigned to image                                                                                                                                                                                           | Text                         |
| Photo Code                       | Image label, from image metadata                                                                                                                                                                                      | Label                        |
| <b>Data obtained from images</b> |                                                                                                                                                                                                                       |                              |
| People                           | Number of people present in the image                                                                                                                                                                                 | Number                       |
| Food Expenditure (\$)            | Weekly food expenditure published with each image                                                                                                                                                                     | Value (\$)                   |
| Food cost per person (\$)        | Weekly food expenditure divided by the number of people per household                                                                                                                                                 | Value (\$)                   |
| Food types                       | Sum of food types in each image. Each major item scored as: 1-vegetable/grain; 2-fish/aquatic; 3-meat/dairy; 4-Other (pizza, biscuits, wine, alcohol, crisps, chocolate, sugary drinks); and all these scores summed. | Number (sum of ranks/scores) |
| Packaging                        | Sum of packaging types in each image. Each major item scored as: 1- cardboard/cartons/glass ; 2- tins /plastic (reusable)/cans; 3- plastic single use; and all these scores summed.                                   | Number (sum of ranks/scores) |
| <b>Classification variables</b>  |                                                                                                                                                                                                                       |                              |
| GDP per capita                   | Gross Domestic Product, obtained from                                                                                                                                                                                 | Value (\$)                   |
| HDI                              | HDI country category derived from UNDP (2015), for consistency with the years of data analyzed and photos (prior to 2013)                                                                                             | Index (0-1)                  |
| HDI group                        | Categories: Low, Medium, High, Very High; as classified by UNDP (2015)                                                                                                                                                | Category                     |
| Technology                       | Sum of the energy source used in all appliances in the image (1-biomass; 2-gas; 3-electricity)                                                                                                                        | Number (sum of ranks/scores) |

| Examples of IPAT parametrizations attempted |                                                                  |                       |
|---------------------------------------------|------------------------------------------------------------------|-----------------------|
| Trial A                                     | People * GDP * Technology                                        | Index (scaled from 0- |
| Trial B                                     | People * Food types * Packaging                                  | 100, where 100 is the |
| Trial C                                     | People * Food cost per person * Packaging                        | maximum country       |
| Trial D                                     | People * cost per person * (Food types + Packaging + Technology) | score obtained)       |

164

165

166

167

168

169

170

171

172

173

174

**Text S4 Illustrative citations on the call for transformative change**

175

176

177

178

179

180

181

182

183

184

185

186

187

188

189

190

191

192

193

194

195

196

197

198

199

200

201

**References**

202

203

See in main text.
